# Supplementary material for: Direct cross-linking of silyl-functionalized cage siloxanes via nonhydrolytic siloxane bond formation for preparing nanoporous materials
Source: Royal Society of Chemistry journal article supplement (doi:10.1039/d4dt00215f), 2024-01-01
Supplement: d4dt00215f1.pdf [file d4dt00215f1.pdf]

## Electronic Supplementary Information

# Direct cross-linking of silyl-functionalized cage siloxanes *via* nonhydrolytic siloxane bond formation for preparing nanoporous materials

Miharu Kikuchi,<sup>‡[a]</sup> Taiki Hayashi,<sup>‡[a]</sup>

Takamichi Matsuno,<sup>[a,b,c]</sup> Kazuyuki Kuroda,<sup>[a,b]</sup> and Atsushi Shimojima\*<sup>[a,b,c]</sup>

<sup>‡</sup> M.K. and T.H. contributed equally to this work.

<sup>a</sup> Department of Applied Chemistry, Faculty of Science and Engineering, Waseda University, 3-4-1 Okubo, Shinjuku-ku, Tokyo 169-8555, Japan.

<sup>b</sup> Kagami Memorial Research Institute for Materials Science and Technology, Waseda University, 2-8-26 Nishiwaseda, Shinjuku-ku, Tokyo 169-0051, Japan.

<sup>c</sup> Waseda Research Institute for Science and Engineering, Waseda University, 3-4-1 Okubo, Shinjuku-ku, Tokyo 169-8555, Japan.

## Table of Contents

### 1. Experimental Details

|                                                          |   |
|----------------------------------------------------------|---|
| Materials .....                                          | 2 |
| Procedure S1. Synthesis of TMA-D4R .....                 | 2 |
| Procedure S2. Synthesis of D4R-SiMe <sub>2</sub> H ..... | 2 |
| Procedure S3. Synthesis of D6R- $\alpha$ CD .....        | 2 |
| Procedure S4. Synthesis of D6R-SiMe <sub>2</sub> H ..... | 3 |

### 2. Additional Data

|                                                                                                                                                                                                                 |   |
|-----------------------------------------------------------------------------------------------------------------------------------------------------------------------------------------------------------------|---|
| Fig. S1. <sup>1</sup> H NMR spectra of (a) D4R-SiMe <sub>2</sub> H and (b) D4R-SiMe <sub>2</sub> OEt .....                                                                                                      | 3 |
| Fig. S2. <sup>1</sup> H NMR spectra of (a) D6R-SiMe <sub>2</sub> H and (b) D6R-SiMe <sub>2</sub> OEt .....                                                                                                      | 4 |
| Fig. S3. (A) FT-IR spectra of (a) D4R-SiMe <sub>2</sub> H, (b) D4R-SiMe <sub>2</sub> OEt, and (c) D4R-PR. (B) FT-IR spectra of (a) D6R-SiMe <sub>2</sub> H, (b) D6R-SiMe <sub>2</sub> OEt, and (c) D6R-PR ..... | 4 |
| Fig. S4. Molecular models for intramolecular condensation of the adjacent silyl groups of cage siloxanes. ....                                                                                                  | 5 |

|                  |   |
|------------------|---|
| References ..... | 5 |
|------------------|---|

## 1. Experimental Details

### Materials

The following reagents were used as received without purification: ethanol (Junsei Chemical Co., Ltd., >99.5%), hexane (Junsei Chemical Co., Ltd., >96.0%), 6 mol L<sup>-1</sup> hydrochloric acid (FUJIFILM Wako Pure Chemical Corporation), 8 mol L<sup>-1</sup> potassium hydroxide (KOH) solution (FUJIFILM Wako Pure Chemical Corporation), pyridine (FUJIFILM Wako Pure Chemical Corporation, >99.5%), tetrahydrofuran (THF, stabilizer free, FUJIFILM Wako Pure Chemical Corporation, >99.8%), tetramethylammonium (TMA) hydroxide pentahydrate (TMAOH·5H<sub>2</sub>O, FUJIFILM Wako Pure Chemical Corporation, >97%), and α-cyclodextrin (αCD, Tokyo Chemical Industry Co., Ltd., >98.0%).

### Procedure S1. Synthesis of TMA-D4R

Tetramethylammonium silicate with a D4R structure (TMA<sub>8</sub>Si<sub>8</sub>O<sub>20</sub>·xH<sub>2</sub>O, **TMA-D4R**) was synthesized according to our previous report.<sup>1</sup> TMAOH·5H<sub>2</sub>O (50.15 g, 276.7 mmol), H<sub>2</sub>O (24.8 mL, 1.38 mol), ethanol (161.0 mL, 2.757 mol), and TEOS (61.4 mL, 274.9 mmol) were mixed in a 300 mL beaker. The molar ratio was TEOS:TMAOH:ethanol:H<sub>2</sub>O = 1:1:10:10. After stirring for 3 d at room temperature, the solvents were evaporated by heating until the liquid volume was reduced to almost half. After cooling, insoluble products were recovered by filtration and dried under reduced pressure to give a white solid (58.70 g). Selective formation of the D4R silicate was confirmed by <sup>29</sup>Si NMR (99.4 MHz, methanol-*d*<sub>4</sub>, δ = -98.99 ppm).

### Procedure S2. Synthesis of D4R-SiMe<sub>2</sub>H

**D4R-SiMe<sub>2</sub>H** was synthesized according to our previous report.<sup>2</sup> **TMA-D4R** (13.26 g) was dissolved in methanol (15 mL). The solution was added to the mixture of DMSCl (20 mL) and hexane (20 mL). After stirring for 1 h at room temperature, the hexane layer was extracted, and the volatile compounds were removed at 40 °C under reduced pressure. The resulting product was washed with acetonitrile to give a white solid (1.86 g). <sup>1</sup>H NMR (500.16 MHz, chloroform-*d*): δ (ppm) = 0.25 (d, *J* = 2.9 Hz, 48H, SiCH<sub>3</sub>), 4.73 (m, 8H, SiH); <sup>13</sup>C NMR (125.77 MHz, chloroform-*d*): δ (ppm) = 0.06; <sup>29</sup>Si NMR (99.37 MHz, chloroform-*d*): δ (ppm) = -1.39 ((SiO)SiMe<sub>2</sub>H), -108.65 (Si(OSi)<sub>4</sub>). The <sup>1</sup>H and <sup>29</sup>Si NMR spectra are shown in Fig. S1(a) and 1A(a), respectively.

### Procedure S3. Synthesis of D6R-αCD

D6R-type potassium silicate sandwiched by two αCD (K<sub>12</sub>Si<sub>12</sub>O<sub>30</sub>·2αCD·xH<sub>2</sub>O, **D6R-αCD**) was synthesized according to the previous report<sup>3</sup> with a slight modification. αCD (25.33 g, 26.03 mmol) and H<sub>2</sub>O (152 mL, 8.44 mol) were added into a beaker. The mixture was ultrasonicated using an ultrasonic stirrer (35 W, 40KHz) (USS-1, NIHONSEIKI KAISHA LTD.) for 15 min to dissolve αCD in H<sub>2</sub>O. Then, TEOS (35.1 mL, 158 mmol) and a KOH aqueous solution (8 mol L<sup>-1</sup>, 19.6 mL) were added to the mixture. The mixture was stirred in a desiccator in the presence of separated ethanol to provide an ethanol vapor in the reaction system. After stirring for 7 d, white precipitates were recovered by filtration and dried under reduced pressure to give a white solid (40.01 g). The <sup>29</sup>Si MAS NMR

spectrum of the product showed overlapped signals assigned to Q<sup>3</sup> (Si(OSi)<sub>3</sub>O<sup>-</sup>) at  $\delta = -99.2$ ,  $-100.1$ , and  $-100.5$  ppm.

#### Procedure S4. Synthesis of D6R-SiMe<sub>2</sub>H

D6R-SiMe<sub>2</sub>H was synthesized according to our previous report.<sup>4</sup> DMSCl (50.0 mL, 460 mmol), pyridine (30.0 mL, 372 mmol), and D6R- $\alpha$ CD (10.0 g, 2.6 mmol) were added to THF (100 mL) cooled in an ice bath (0 °C). The mixture was stirred at 0 °C for 2 h and then at room temperature for 1 d. After the stirring, ethanol (26.8 mL) and hexane (~50 mL) were added to the mixture and the mixture was stirred at 0 °C for several minutes in an ice bath. The precipitate was removed via filtration and the solvent was removed at 40 °C under reduced pressure. After the addition of hexane (~50 mL) to the resulting solid, the insoluble component was removed via filtration, and the solvent was removed at 40 °C under reduced pressure to form a white solid (1.81 g). <sup>1</sup>H NMR (500.16 MHz, chloroform-*d*):  $\delta$  (ppm) = 0.24 (d, *J* = 2.3 Hz, 72H; SiCH<sub>3</sub>), 4.74 (m, 12H, SiH); <sup>13</sup>C NMR (125.77 MHz, chloroform-*d*):  $\delta$  (ppm) = 0.15; <sup>29</sup>Si NMR (99.37 MHz):  $\delta$  (ppm) =  $-2.35$  ((SiO)SiMe<sub>2</sub>H),  $-109.58$  (Si(OSi)<sub>4</sub>). The <sup>1</sup>H and <sup>29</sup>Si NMR spectra are shown in Figs. S2(a) and 1B(a), respectively.

## 2. Additional Data

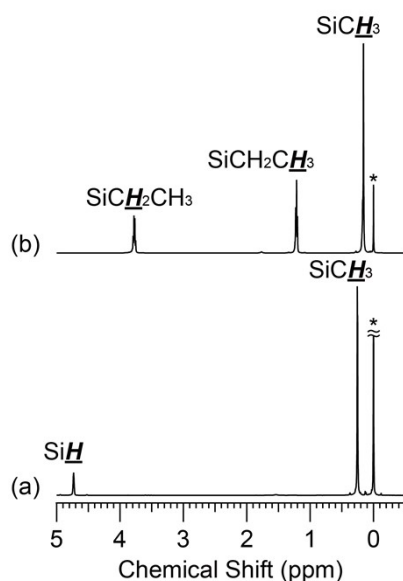

Fig. S1. <sup>1</sup>H NMR spectra of (a) D4R-SiMe<sub>2</sub>H and (b) D4R-SiMe<sub>2</sub>OEt.

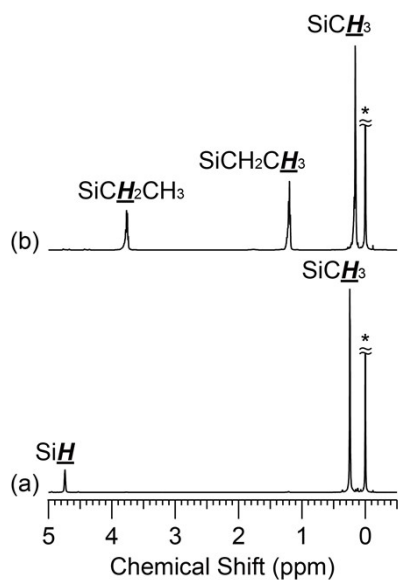

**Fig. S2.**  $^1\text{H}$  NMR spectra of (a) **D6R-SiMe<sub>2</sub>H** and (b) **D6R-SiMe<sub>2</sub>OEt**.

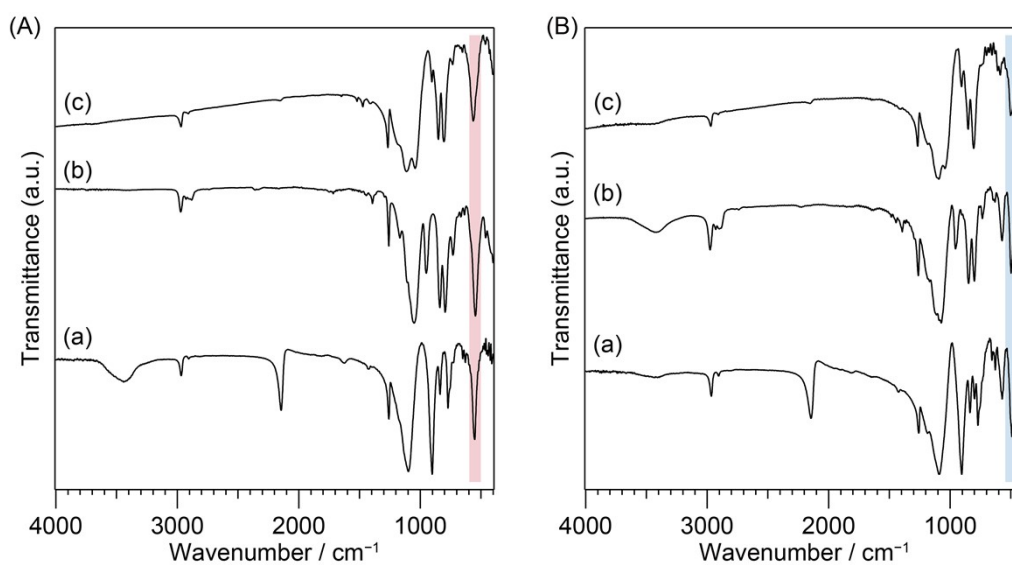

**Fig. S3.** (A) FT-IR spectra of (a) **D4R-SiMe<sub>2</sub>H**, (b) **D4R-SiMe<sub>2</sub>OEt**, and (c) **D4R-PR**. (B) FT-IR spectra of (a) **D6R-SiMe<sub>2</sub>H**, (b) **D6R-SiMe<sub>2</sub>OEt**, and (c) **D6R-PR**.

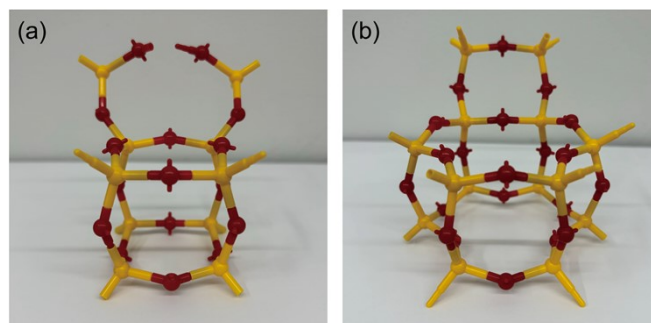

**Fig. S4.** Molecular models for intramolecular condensation of the adjacent silyl groups of cage siloxanes. (a) In D4R siloxane, formation of the tetrasiloxane ring cannot occur. (b) In D6R siloxane, the tetrasiloxane ring can be formed.

### References

- 1 Y. Hattori, T. Hayashi, T. Hikino, R. Miwa, Y. Oka, K. Fujino, N. Sato, T. Matsuno, H. Wada, K. Kuroda and A. Shimojima, *J. Sol-Gel Sci. Technol.*, 2023, **108**, 392.
- 2 N. Sato, Y. Kuroda, T. Abe, H. Wada, A. Shimojima and K. Kuroda, *Chem. Commun.*, 2015, **51**, 11034.
- 3 K. Benner, P. Klüfers and J. Schuhmacher, *Angew. Chem. Int. Ed. Engl.*, 1997, **36**, 743.
- 4 N. Sato, H. Wada, K. Kuroda and A. Shimojima, *Chem. Lett.*, 2023, upad048.
